# Supplementary material
Source: PubMed Central journal article supplement (PMC4433572)
Supplement: NIHMS667356-supplement-01.pdf [file NIHMS667356-supplement-01.pdf]

Supplemental Table 1: Fully adjusted<sup>†</sup> odds ratios and 95% confidence intervals for pregnancy and infant outcomes by race/ethnicity and asthma status among singleton deliveries in the Consortium on Safe Labor, 2002-2008\*

|                                         | Black                    |                          | Hispanic                 |                          | Asian/PI                 |                          |
|-----------------------------------------|--------------------------|--------------------------|--------------------------|--------------------------|--------------------------|--------------------------|
|                                         | No asthma<br>n= (44,840) | Asthma<br>n= (5,444)     | No asthma<br>n= (36,543) | Asthma<br>n= (2,288)     | No asthma<br>n = (8,970) | Asthma<br>n = (211)      |
| <b>Pregnancy outcomes</b>               |                          |                          |                          |                          |                          |                          |
| Gestational diabetes                    | 0.97 (0.90, 1.04)        | 0.92 (0.78, 1.10)        | <b>1.63 (1.53, 1.74)</b> | <b>1.28 (1.04, 1.57)</b> | <b>2.41 (2.22, 2.61)</b> | <b>2.00 (1.25, 3.22)</b> |
| Gestational hypertension                | <b>0.81 (0.75, 0.88)</b> | <b>0.73 (0.60, 0.89)</b> | <b>0.62 (0.57, 0.68)</b> | <b>0.67 (0.49, 0.92)</b> | <b>0.48 (0.39, 0.58)</b> | 0.52 (0.19, 1.43)        |
| Maternal hemorrhage                     | 1.02 (0.96, 1.08)        | 0.94 (0.82, 1.08)        | <b>0.95 (0.89, 1.00)</b> | 0.87 (0.72, 1.06)        | 1.00 (0.90, 1.10)        | <b>0.44 (0.19,1.00)</b>  |
| Placental abruption                     | 1.06 (0.95, 1.19)        | 1.06 (0.84, 1.35)        | <b>0.78 (0.69, 0.88)</b> | <b>0.62 (0.81, 0.93)</b> | 0.94 (0.77, 1.16)        | 0.51 (0.13, 2.03)        |
| Preeclampsia                            | <b>1.40 (1.31, 1.49)</b> | 0.98 (0.84, 1.15)        | 1.07 (1.00, 1.15)        | 0.86 (0.69, 1.07)        | 0.69 (0.62, 0.78)        | 0.81 (0.42, 1.58)        |
| Preterm birth, <37 wk                   | <b>1.34 (1.28, 1.40)</b> | <b>1.22 (1.11, 1.35)</b> | 0.99 (0.94, 1.04)        | 1.00 (0.87, 1.16)        | <b>0.90 (0.83, 0.97)</b> | 1.06 (0.70, 1.61)        |
| PROM                                    | <b>1.13 (1.07, 1.19)</b> | 1.12 (0.97, 1.29)        | 1.02 (0.96, 1.08)        | 1.08 (0.90, 1.28)        | 1.04 (0.96, 1.13)        | 1.24 (0.75, 2.05)        |
| PPROM                                   | <b>1.35 (1.24, 1.47)</b> | 1.10 (0.89, 1.35)        | 1.05 (0.95, 1.16)        | 1.15 (0.88, 1.51)        | 0.95 (0.81, 1.12)        | 0.90 (0.37, 2.21)        |
| <b>Infant outcomes</b>                  |                          |                          |                          |                          |                          |                          |
| Anemia                                  | <b>1.56 (1.40, 1.73)</b> | <b>1.36 (1.07, 1.73)</b> | 1.09 (0.97, 1.21)        | 1.12 (0.80, 1.55)        | 0.84 (0.68, 1.04)        | 0.23 (0.03, 1.82)        |
| Apnea                                   | 0.99 (0.90, 1.08)        | <b>0.79 (0.63, 0.99)</b> | 0.91 (0.82, 1.01)        | 1.13 (0.85, 1.51)        | <b>0.74 (0.60, 0.91)</b> | 0.81 (0.29, 2.24)        |
| Term birth weight                       |                          |                          |                          |                          |                          |                          |
| Low birth weight < 2500 g <sup>a</sup>  | <b>1.72 (1.63, 1.81)</b> | <b>1.55 (1.38, 1.74)</b> | <b>1.08 (1.02, 1.14)</b> | 1.04 (0.88, 1.23)        | <b>1.11 (1.01, 1.21)</b> | 0.85 (0.48, 1.50)        |
| High birth weight ≥ 4000 g <sup>a</sup> | <b>0.54 (0.51, 0.58)</b> | <b>0.46 (0.39, 0.55)</b> | <b>0.87 (0.82, 0.92)</b> | 0.83 (0.69, 1.01)        | <b>0.52 (0.47, 0.57)</b> | <b>0.46 (0.23, 0.83)</b> |
| Hyperbilirubinemia                      | <b>0.70 (0.67, 0.73)</b> | <b>0.65 (0.58, 0.73)</b> | 1.01 (0.97, 1.05)        | 1.07 (0.94, 1.23)        | <b>1.53 (1.45, 1.62)</b> | <b>1.61 (1.14, 2.30)</b> |
| NICU admission                          | <b>1.28 (1.22, 1.33)</b> | 1.10 (0.99, 1.21)        | 0.99 (0.94, 1.03)        | 0.96 (0.84, 1.11)        | <b>0.86 (0.79, 0.93)</b> | 0.58 (0.35, 0.97)        |
| Respiratory distress                    | <b>1.20 (1.11, 1.30)</b> | 1.07 (0.89, 1.28)        | <b>0.87 (0.80, 0.95)</b> | 1.03 (0.80, 1.33)        | <b>0.61 (0.51, 0.73)</b> | 0.77 (0.34, 1.74)        |
| Transient tachypnea                     | <b>1.15 (1.07, 1.23)</b> | 1.05 (0.89, 1.24)        | <b>0.89 (0.82, 0.96)</b> | 0.81 (0.64, 1.04)        | <b>0.64 (0.55, 0.75)</b> | 0.59 (0.24, 1.45)        |

Abbreviations: CI, confidence interval; PROM, premature rupture of membranes; PPRM, preterm premature rupture of membranes.

\* White mothers with and without asthma are the reference categories.

† Adjusted for maternal asthma (estimates are based on the interaction of asthma and race/ethnicity) as well as age; marital status; insurance; pre-pregnancy body mass index; smoking and alcohol use during pregnancy; history of either pre-existing diabetes (except for gestation diabetes), HIV, chronic hypertension (except for gestational hypertension, preeclampsia), or thyroid disease; parity; cesarean delivery; and clinical site.

<sup>a</sup>Birth weight was missing or implausible for 121 (0.8%) neonates
